# Supplementary material for: Species interactions can shift the response of a maerl bed community to ocean acidification and warming
Source: Copernicus journal article supplement (doi:10.5194/bg-14-5359-2017), 2017-11-30
Supplement: Supplementary file 1 [file bg-14-5359-2017-supplement.pdf]

Supplement of Biogeosciences, 14, 5359–5376, 2017  
<https://doi.org/10.5194/bg-14-5359-2017-supplement>  
© Author(s) 2017. This work is distributed under  
the Creative Commons Attribution 4.0 License.

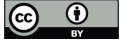

*Supplement of*

## **Species interactions can shift the response of a maerl bed community to ocean acidification and warming**

**Erwann Legrand et al.**

*Correspondence to:* Erwann Legrand ([erwann.legrand@sb-roscoff.fr](mailto:erwann.legrand@sb-roscoff.fr))

The copyright of individual parts of the supplement might differ from the CC BY 4.0 License.

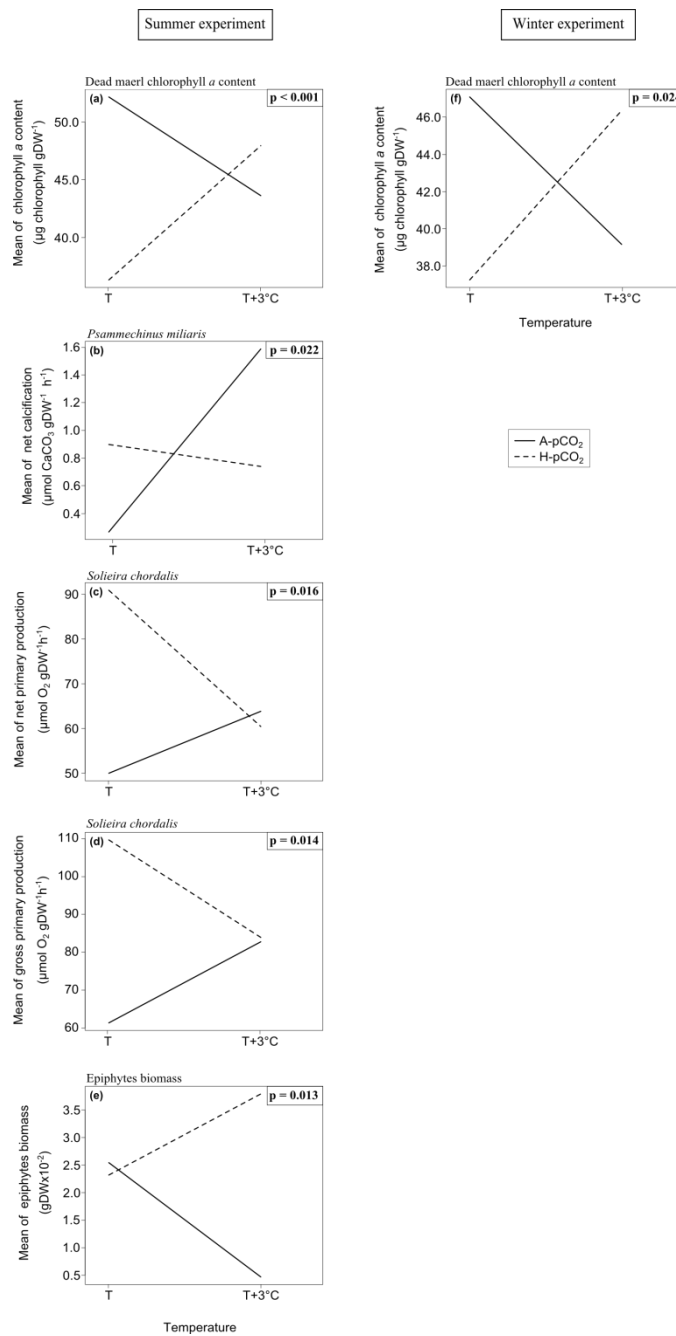

Fig. S1. Interaction plots for the effects of temperature and pCO<sub>2</sub> on dead maerl chlorophyll *a* content in (a) the summer and (f) winter seasons, (b) *P. miliaris* net calcification in the summer, *S. chordalis* (c) net and (f) gross primary production in the summer, and (e) epiphytes biomass in the summer. Plots were done only when an interactive effect of temperature and pCO<sub>2</sub> was detected using 2-way ANOVA (p-value in bold).
